# Supplementary material
Source: PubMed Central journal article supplement (PMC7573451)
Supplement: IAI.00252-20-s0001.pdf [file IAI.00252-20-s0001.pdf]

Table S1. Diarrhea and fecal shedding of bacteria after challenge with  $4.95 \times 10^{11}$  CFU of CFA/I<sup>+</sup> ETEC strain H10407<sup>a,b</sup>

| Vaccine <sup>c</sup> | Diarrhea                |                                |                                | Fecal shedding of H10407 |                                |                                   |
|----------------------|-------------------------|--------------------------------|--------------------------------|--------------------------|--------------------------------|-----------------------------------|
|                      | No. with diarrhea/N (%) | Median no. days to onset (IQR) | Median no. days duration (IQR) | % Incidence              | Median no. days to onset (IQR) | Median no. days of duration (IQR) |
| Chimera              | 5/10 (50)               | 1 (1-2.5)                      | 7 (2.5-8.5)                    | 100                      | 1 (-)                          | 6.5 (4.75-7.25)                   |
| Chimera + LT(R192G)  | 1/9 (11)                | 3 (-)                          | 4 (-)                          | 100                      | 1 (-)                          | 6 (5-8)                           |
| PBS                  | 7/10 (70)               | 1 (1-2)                        | 5 (2-7)                        | 100                      | 1 (-)                          | 8 (6-9)                           |

<sup>a</sup> A diarrheal episode was defined as 2 or more consecutive days of grade 3 or higher stool consistency that begins as the first day of at least 2 consecutive days of diarrhea starting as early as day one after challenge, and ends when 2 or more days pass without diarrhea.

<sup>b</sup> Fecal shedding defined as isolation of CFA/I<sup>+</sup> ETEC strain H10407 from stool collected after challenge that begins (onset) as early as day one after challenge and ends (duration) on last day, up to day 10, that the strain is shed in the stool.

<sup>c</sup> All vaccine antigens were administered intradermally; for all immunizations, doses of 129 µg chimera, 129 µg chimera + 0.1 µg LT(R192G) or PBS alone were given; immunizations were performed on study days 0, 14, 28, 84.
