# Supplementary material
Source: PubMed Central journal article supplement (PMC7573451)
Supplement: IAI.00252-20-s0002.pdf [file IAI.00252-20-s0002.pdf]

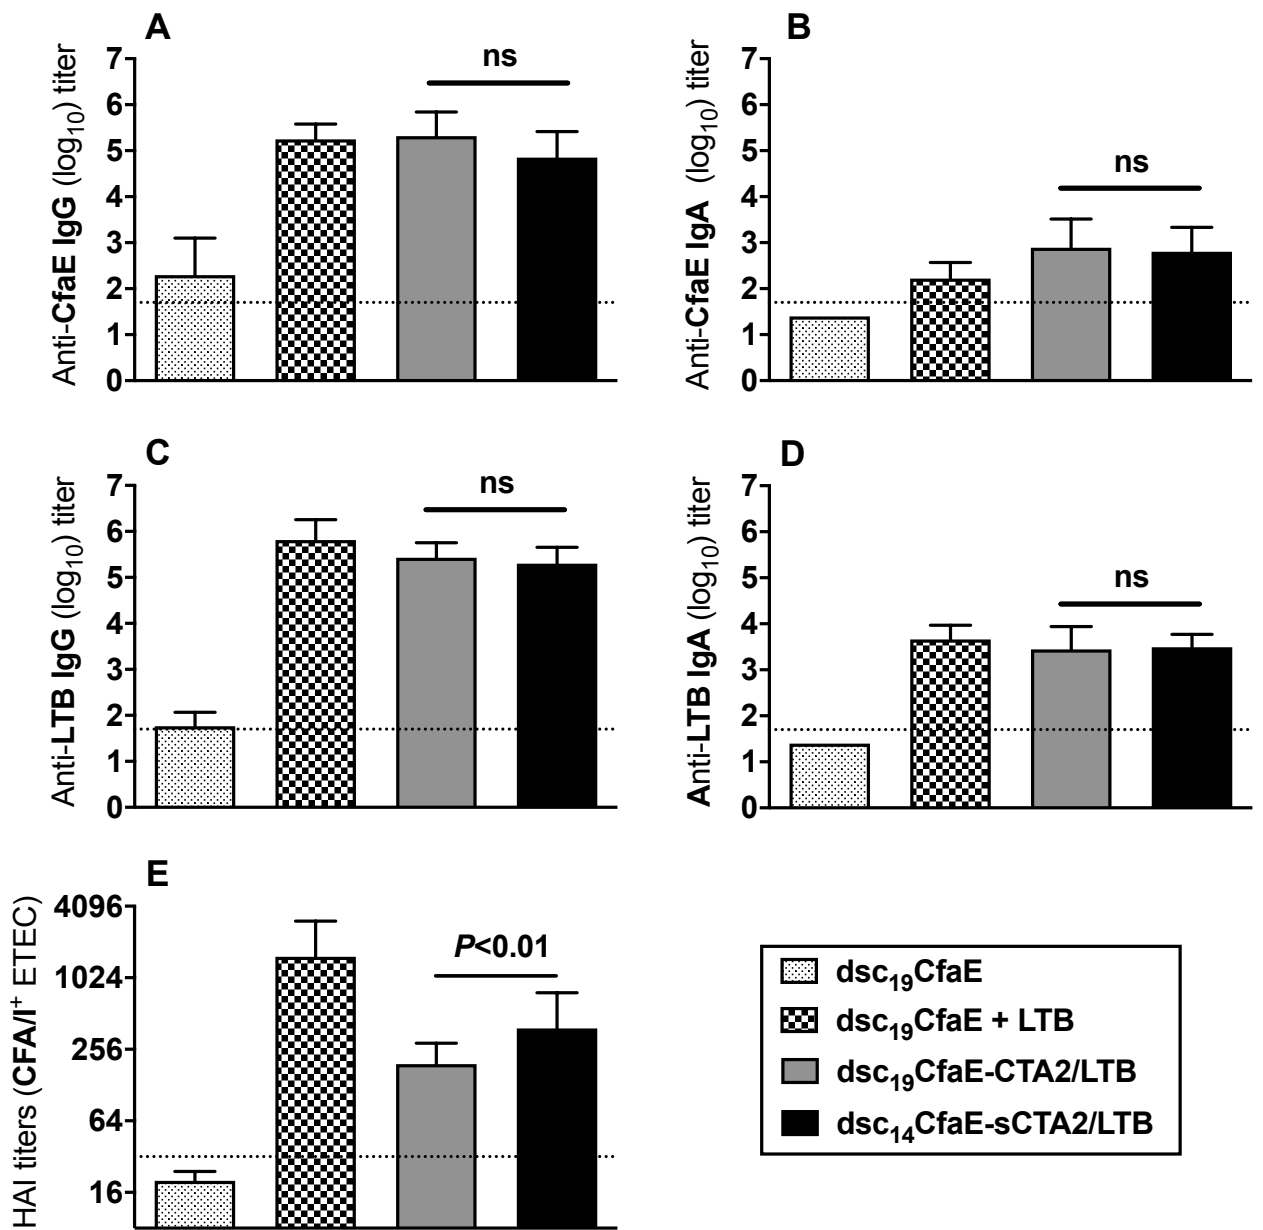

**Supplemental figure 1. Comparison of the immunogenicity of dsc<sub>14</sub>CfaE-sCTA2/LTB and dsc<sub>19</sub>CfaE-CTA2/LTB chimera proteins.** BALB/c mice (10/group) were immunized IN on days 0, 14 and 28 with 21  $\mu$ g dsc<sub>14</sub>CfaE-sCTA2/LTB, 21  $\mu$ g dsc<sub>19</sub>CfaE-CTA2/LTB, or 8  $\mu$ g dsc<sub>19</sub>CfaE  $\pm$  12  $\mu$ g LTB. **(A, B)** Anti-CfaE IgG and IgA serum antibody responses; **(C, D)** Anti-LTB IgG and IgA antibody responses. ELISA results (A-D) are presented as mean  $\log_{10}$  titers  $\pm$  SD in serum taken two weeks after the third dose (day 42). **(E)** Functional antibody titers by HAI (median  $\pm$  interquartile range). Horizontal dotted lines denote the limit of detection for the assays. Statistical significance between two chimera groups was determined by using *t*-test and significant differences are indicated on the graph.
