# Supplementary material
Source: PubMed Central journal article supplement (PMC7573451)
Supplement: IAI.00252-20-s0003.pdf [file IAI.00252-20-s0003.pdf]

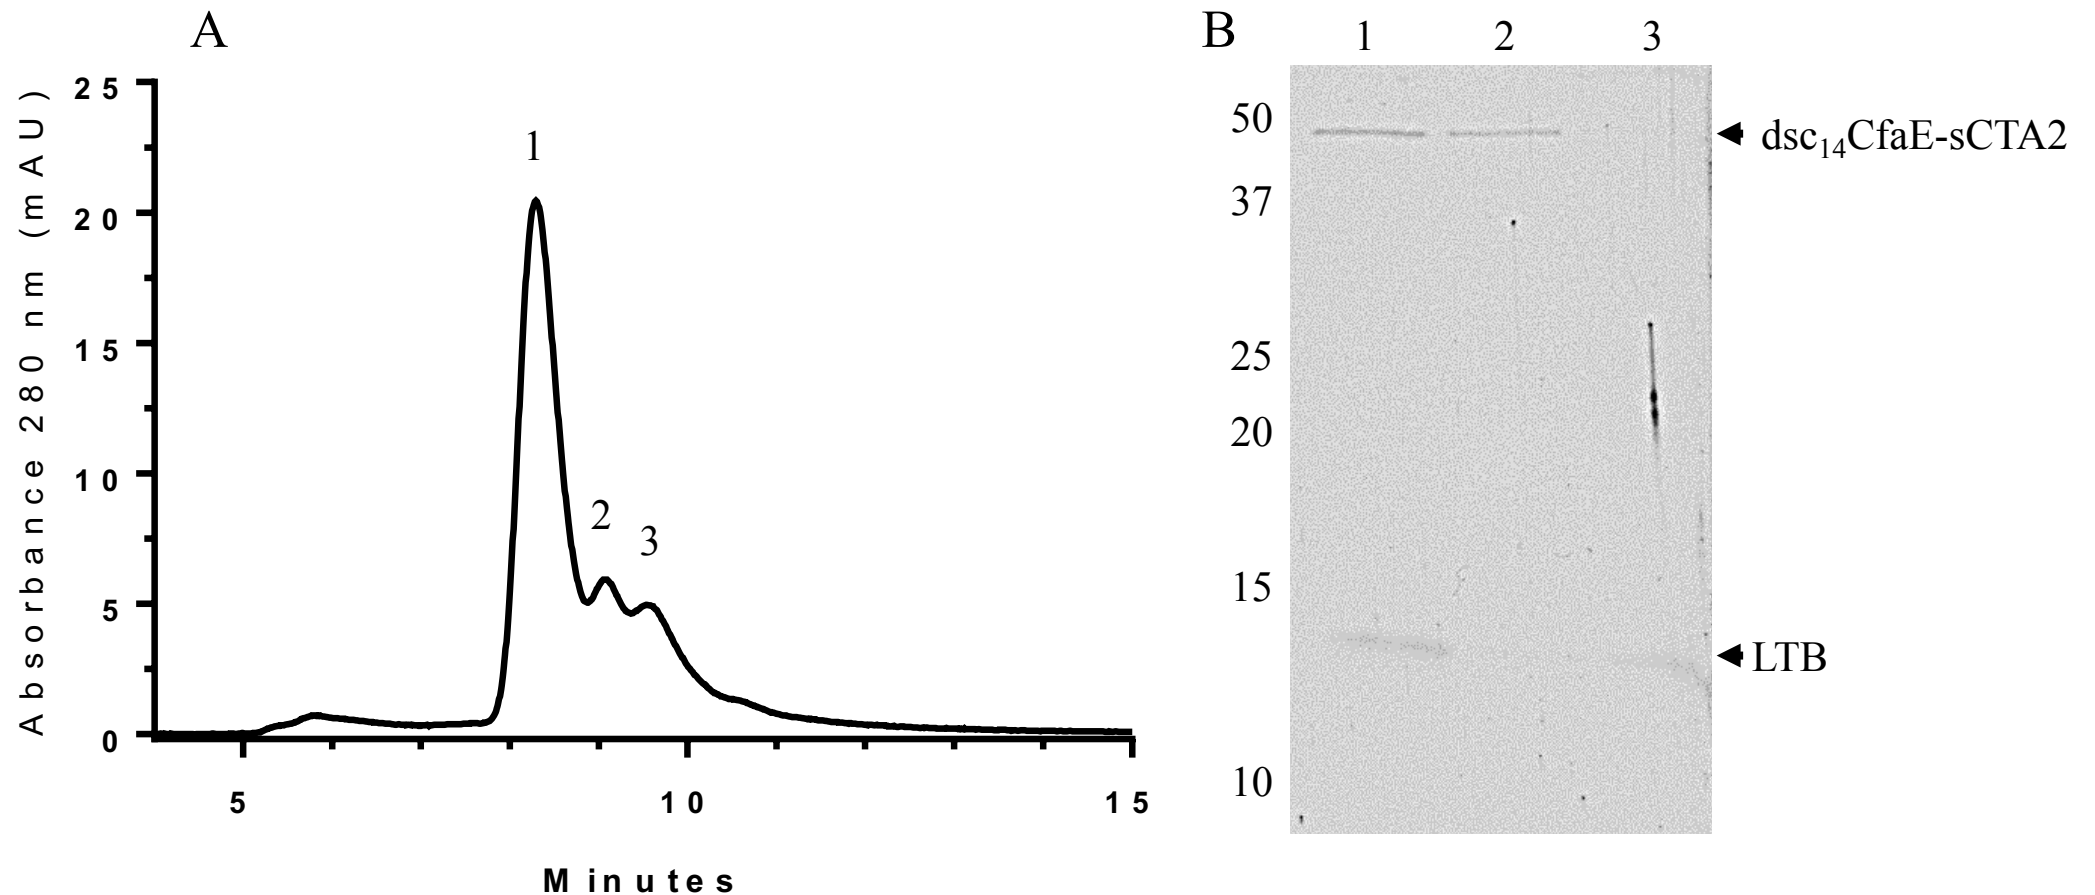

**Supplemental figure 2.** HPLC-SEC analysis of the chimera (stored at  $-80^{\circ}\text{C}$  for 12 months). **(A)** HPLC-SEC elution profile of the chimera at 280 nanometers (nm), measured in milli-absorbance units (mAU). Three peaks, one primary and two secondary peaks were observed, which are denoted as 1, 2, and 3 on the profile. **(B)** SDS-PAGE analysis of the peaks three peaks detected in the HPLC-SEC analysis. A  $5\ \mu\text{L}$  sample from peak 1 (Lane 1) and  $10\ \mu\text{L}$  samples from peaks 2 and 3 (Lanes 2 and 3, respectively) were separated by SDS-PAGE. The molecular weight markers (in kDa) are denoted on the left.
