# Supplementary material
Source: PubMed Central journal article supplement (PMC7573451)
Supplement: IAI.00252-20-s0004.pdf [file IAI.00252-20-s0004.pdf]

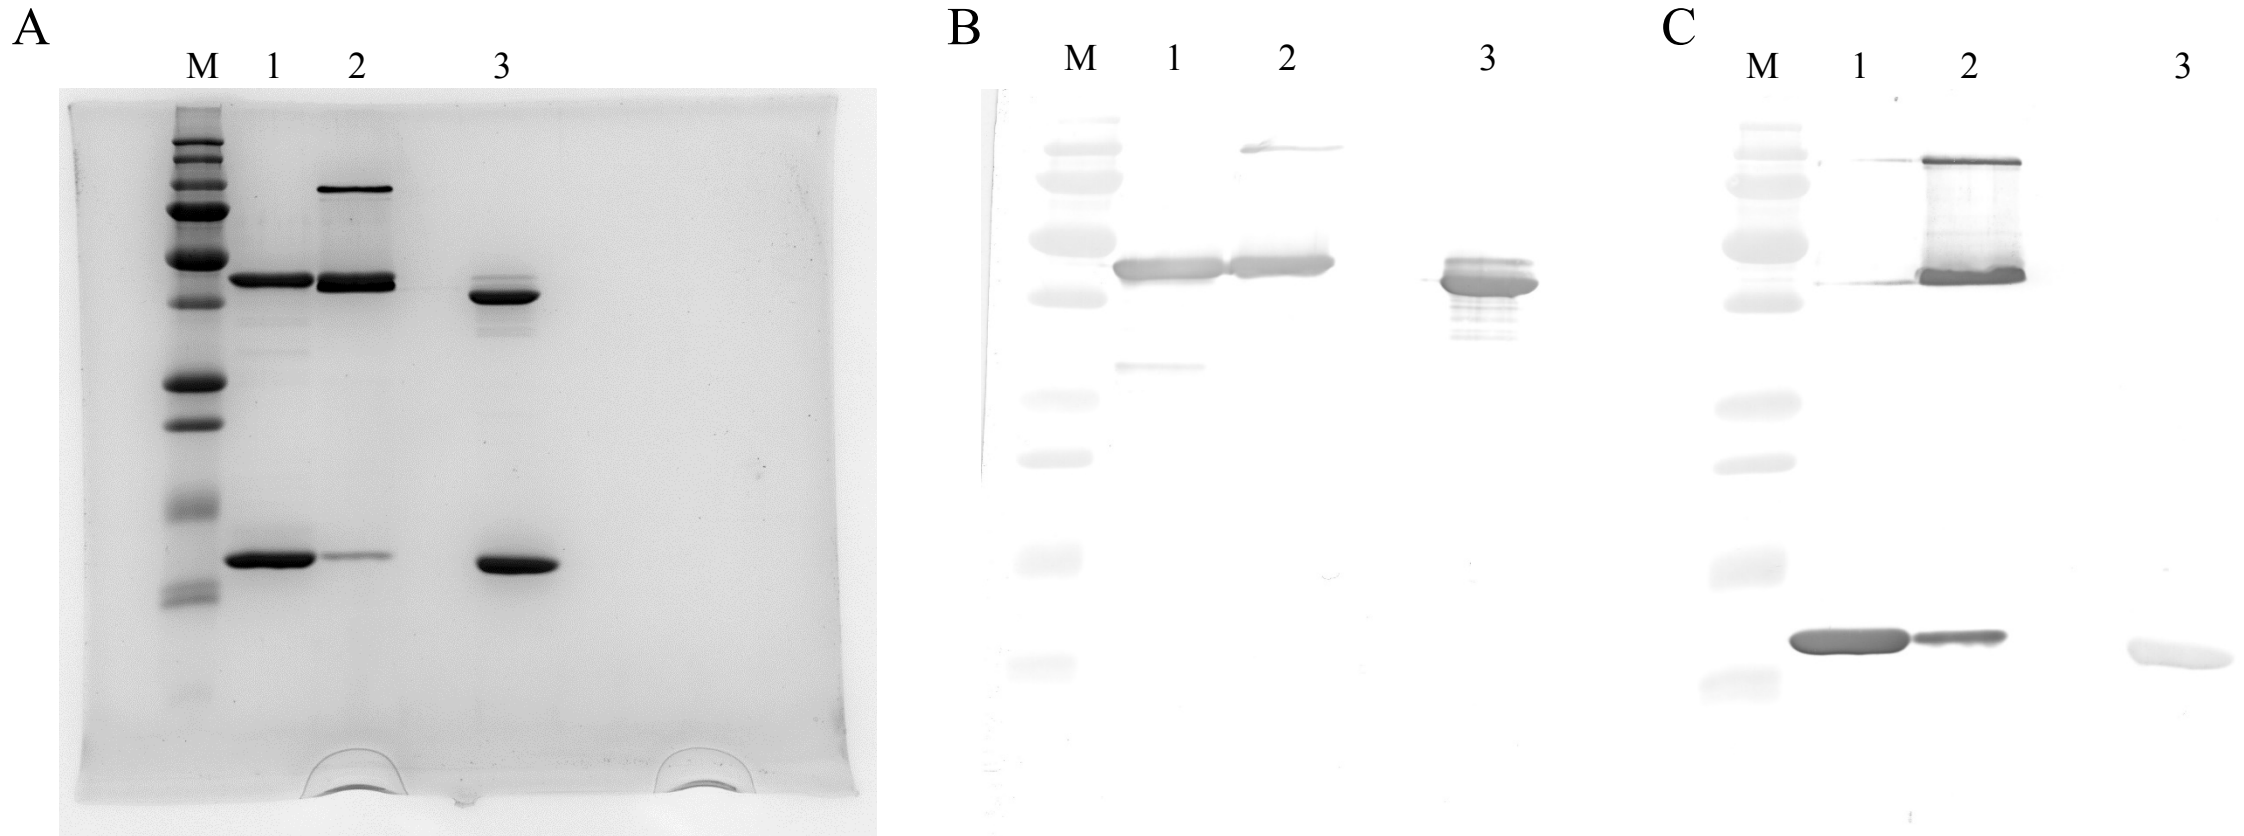

**Supplemental figure 3.** Original images used to assemble Figure 1. **(A)**  $dsc_{14}$ CfaE-sCTA2/LTB chimera was separated by 15% SDS-PAGE and stained with Coomassie Blue); **(B)** Immunodetection with CfaE antisera; **(C)** Immunodetection with LTB antisera. Lanes: M-molecular weight marker (Bio-Rad Precision Plus Protein™ Standards); 1-heat-treated, reduced; 2-unheated, reduced; 3-heat-treated, not reduced.
