# Supplementary material
Source: PubMed Central journal article supplement (PMC7573451)
Supplement: IAI.00252-20-s0005.pdf [file IAI.00252-20-s0005.pdf]

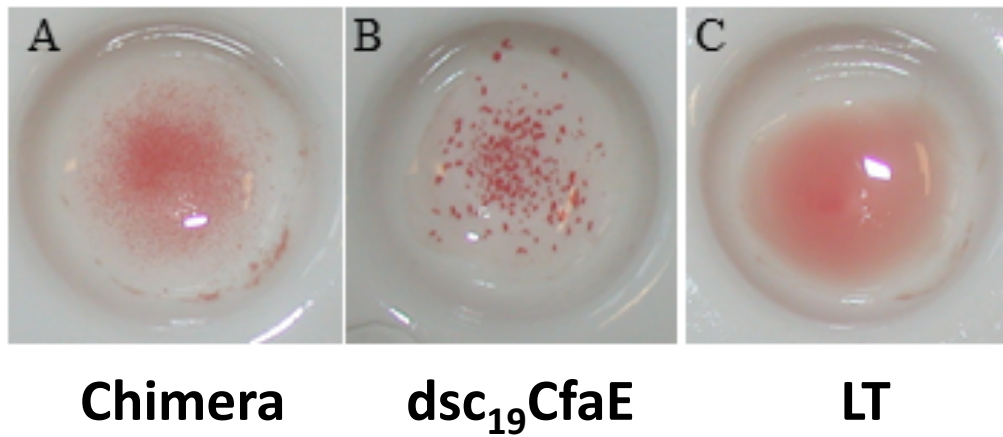

**Supplemental figure 4. *In vitro* adherence of chimera to bovine erythrocytes evaluated by visual hemagglutination.** Polystyrene beads were coated with (A) chimera, (B) dsc<sub>19</sub>CfaE or (C) LT and incubated with bovine erythrocytes.
