# Supplementary material
Source: PubMed Central journal article supplement (PMC7573451)
Supplement: IAI.00252-20-s0006.pdf [file IAI.00252-20-s0006.pdf]

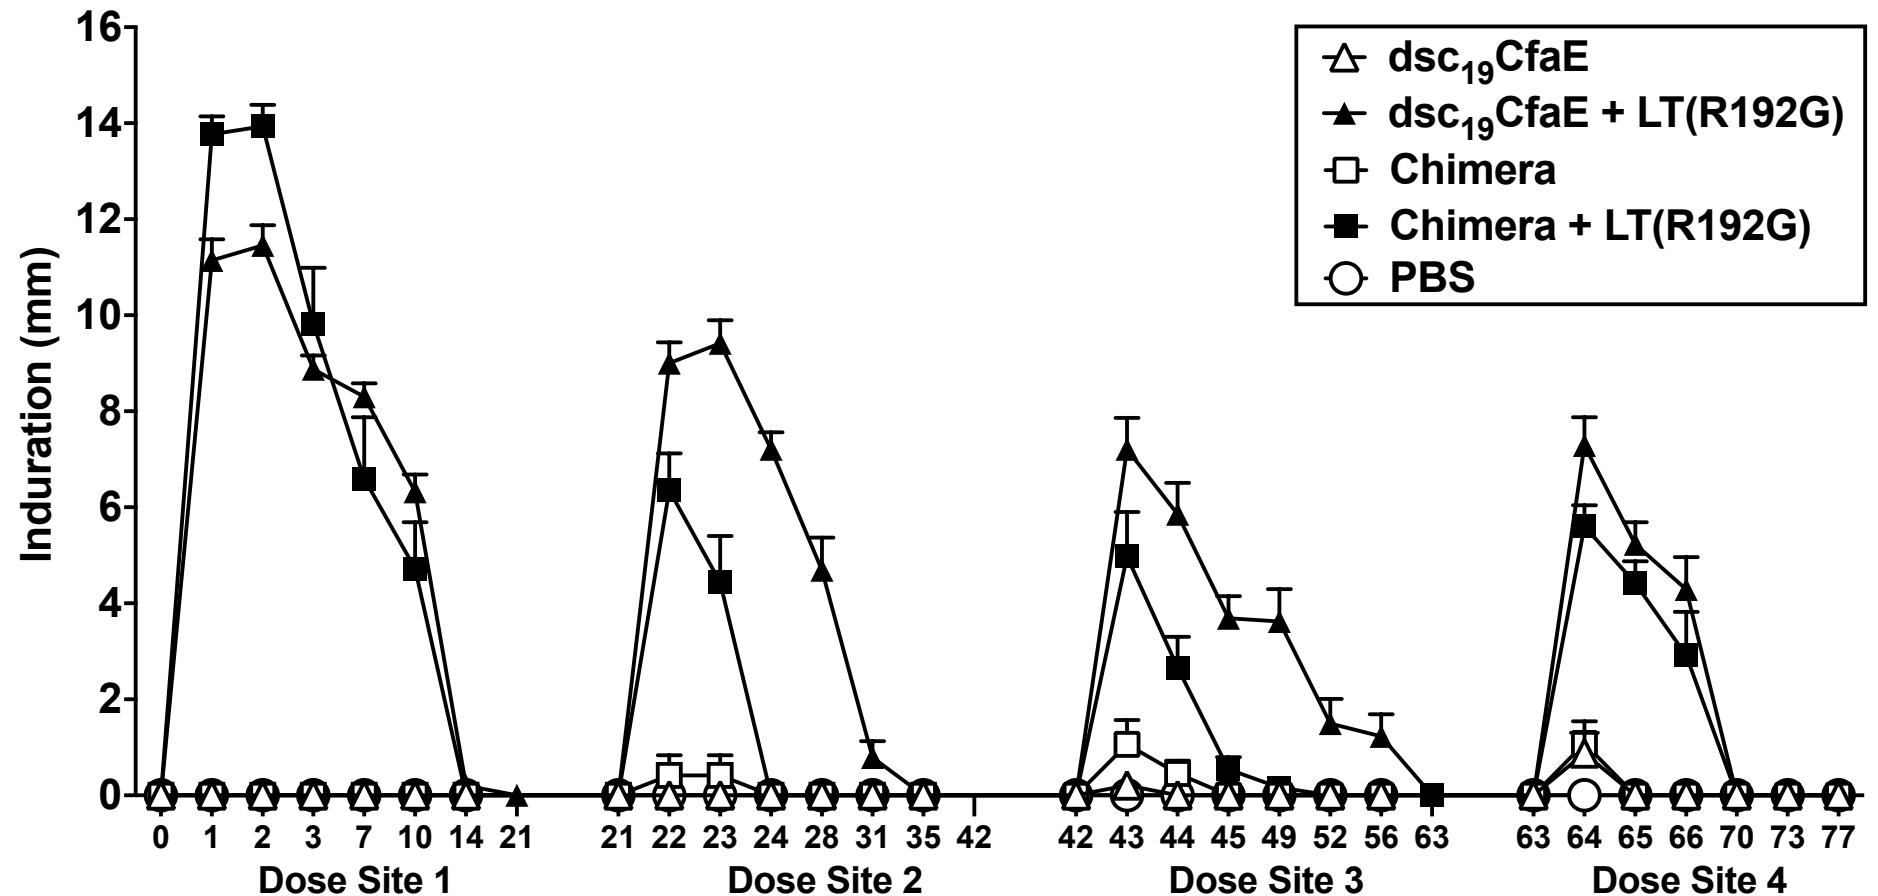

**Supplemental figure 5. Evaluation of skin reactivity in guinea pigs.** Guinea pigs (n=24/group) were immunized with 13  $\mu\text{g}$  chimera  $\pm$  0.1  $\mu\text{g}$  LT(R192G), 25  $\mu\text{g}$  dsc<sub>19</sub>CfaE  $\pm$  0.1  $\mu\text{g}$  LT(R192G) or PBS by the ID route on days 0, 21, 42 and 63. Skin induration at the site of immunization was measured 0, 1, 2, 3, 7, 10, 14 and 21 days after each immunization. Measurements were made length-wise (cranial to caudal) and width-wise (right to left). Data shown is the average of the two measurements.
