# Supplementary material
Source: PubMed Central journal article supplement (PMC7573451)
Supplement: IAI.00252-20-s0007.pdf [file IAI.00252-20-s0007.pdf]

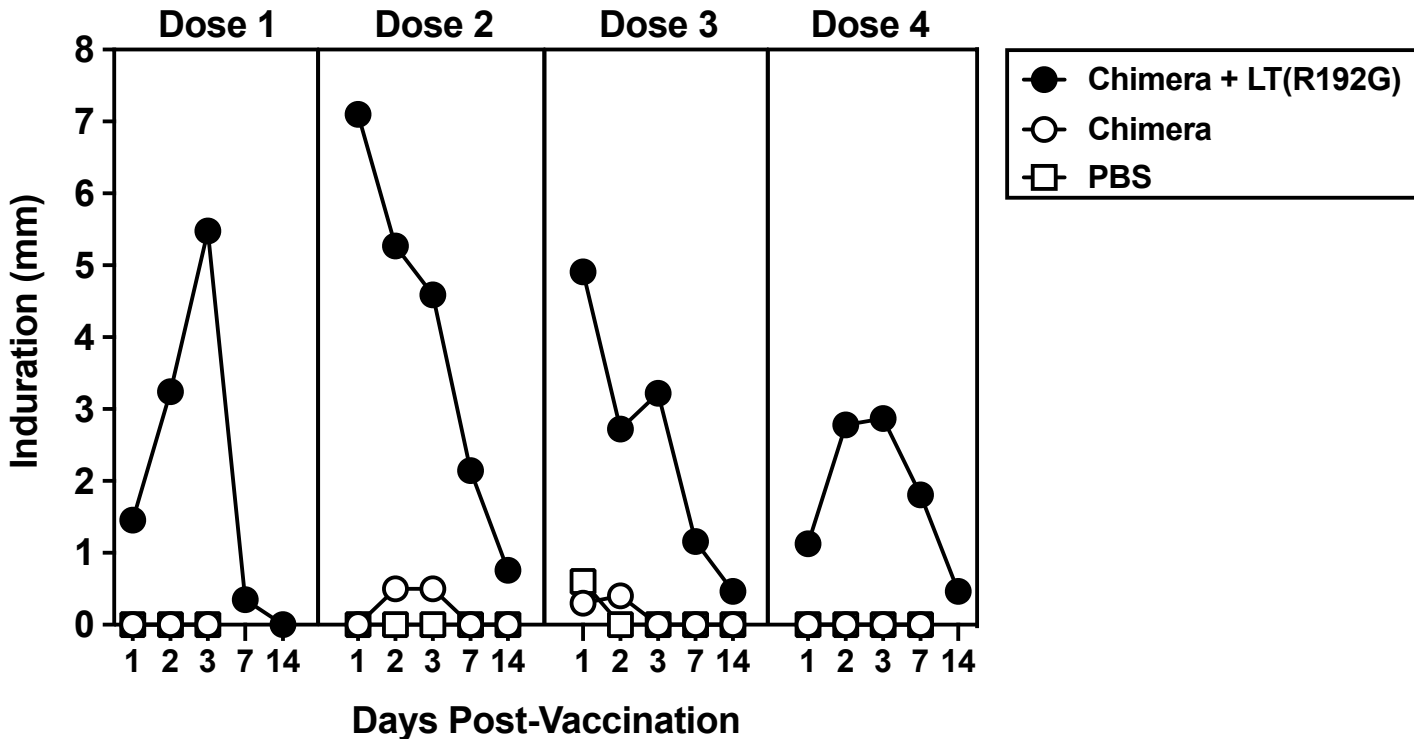

**Supplemental figure 6. Evaluation of skin reactogenicity in *A. nancymae*.**

Monkeys were immunized ID with 129  $\mu\text{g}$  chimera  $\pm$  0.1  $\mu\text{g}$  LT(R192G) or PBS on study days 0, 14, 28 and 84 and skin induration was measured 1, 2, 3, 7 and 14 days after each immunization. Measurements were made length-wise (cranial to caudal) and width-wise (right to left) and shown as the average of the two measurements.
